# Supplementary material for: Role of metcar on the adsorption and activation of carbon dioxide: a DFT study
Source: Royal Society of Chemistry journal article supplement (doi:10.1039/d0cp05756h), 2021-01-01
Supplement: d0cp05756h1.pdf [file d0cp05756h1.pdf]

# Electronic Supplementary Information for: Role of metcar on the adsorption and activation of carbon dioxide: A DFT Study

Megha,<sup>a‡</sup> Arup Banerjee,<sup>a‡</sup> and Tapan K. Ghanty<sup>\*bc‡</sup>

<sup>a</sup> Human Resources Development Section, Raja Ramanna Centre for Advanced Technology, Indore 452013, India.

<sup>b</sup> Theoretical Chemistry Section, Chemistry Group, Bhabha Atomic Research Centre, Mumbai 400085, India.

<sup>c</sup> Bio-Science Group, Bhabha Atomic Research Centre, Mumbai 400085, India. Email: [tapang@barc.gov.in](mailto:tapang@barc.gov.in)

<sup>‡</sup> Homi Bhabha National Institute, Training School Complex, Anushaktinagar, Mumbai 400094, India.

## Contents

|   |                                                                                             |   |
|---|---------------------------------------------------------------------------------------------|---|
| 1 | Geometric and electronic characterization of bare $\text{Ti}_8\text{C}_{12}$ cluster        | 4 |
| 2 | IR spectra of the $\text{CO}_2$ molecule chemisorbed onto $\text{Ti}_8\text{C}_{12}$ metcar | 6 |

## List of Figures

|    |                                                                                                                                                                                                                                                                                                                                                                                                                                                                                                                                                                                             |    |
|----|---------------------------------------------------------------------------------------------------------------------------------------------------------------------------------------------------------------------------------------------------------------------------------------------------------------------------------------------------------------------------------------------------------------------------------------------------------------------------------------------------------------------------------------------------------------------------------------------|----|
| S1 | Optimized structures of pristine $\text{Ti}_8\text{C}_{12}$ metcar using LDZ and PBE XC functional. $\text{Ti}^o$ and $\text{Ti}^i$ correspond to the Ti atoms of the outer and inner tetrahedrons, respectively. The symmetry of the isomer is written at the bottom. The value of spin multiplicity ( $2S+1$ ) of this isomer is 3. Blue and grey balls represent Ti and C atoms, respectively. . . . .                                                                                                                                                                                   | 6  |
| S2 | Infrared spectra of two lowest energy isomers of $\text{Ti}_8\text{C}_{12}$ met-car obtained using B3LYP XC functional and LDZ basis set together with the experimental data taken from Ref. 1. . . . .                                                                                                                                                                                                                                                                                                                                                                                     | 15 |
| S3 | Infrared spectra of the lowest energy isomer of $\text{Ti}_8\text{C}_{12}$ met-car obtained using PBE XC functional and LDZ basis set. . . . .                                                                                                                                                                                                                                                                                                                                                                                                                                              | 16 |
| S4 | Optimized structures of $\text{Ti}_8\text{C}_{12}\text{-CO}_2$ cluster-molecule complex using PBE XC functional and LDZ basis set. The first number within the parentheses corresponds to the spin multiplicity ( $2S+1$ ) and the second number denotes the relative energy (in eV) of the $\text{Ti}_8\text{C}_{12}\text{-CO}_2$ complexes with respect to the most stable isomer <i>B</i> . $\text{Ti}^o$ and $\text{Ti}^i$ correspond to the Ti atoms of the outer and inner tetrahedrons, respectively. Blue, grey, and red balls represent Ti, C, and O atoms, respectively. . . . .  | 16 |
| S5 | Optimized structures of $\text{Ti}_8\text{C}_{12}\text{-CO}_2$ cluster-molecule complex using PBE0 XC functional and LDZ basis set. The first number within the parentheses corresponds to the spin multiplicity ( $2S+1$ ) and the second number denotes the relative energy (in eV) of the $\text{Ti}_8\text{C}_{12}\text{-CO}_2$ complexes with respect to the most stable isomer <i>A</i> . $\text{Ti}^o$ and $\text{Ti}^i$ correspond to the Ti atoms of the outer and inner tetrahedrons, respectively. Blue, grey, and red balls represent Ti, C, and O atoms, respectively. . . . . | 17 |
| S6 | Infrared spectra for the lowest energy structures of $\text{Ti}_8\text{C}_{12}\text{-CO}_2$ complex together with the corresponding spectra for gas phase $\text{CO}_2$ obtained with B3LYP functional and LDZ basis set. The symbols (*), ( $\dagger$ ), and (#) separately denotes the bending, symmetric stretching, and asymmetric stretching modes of $\text{CO}_2$ molecule. . . . .                                                                                                                                                                                                  | 17 |

|    |                                                                                                                                                                                                                                                                                                                                                                                                                                                                                  |    |
|----|----------------------------------------------------------------------------------------------------------------------------------------------------------------------------------------------------------------------------------------------------------------------------------------------------------------------------------------------------------------------------------------------------------------------------------------------------------------------------------|----|
| S7 | (a) Reaction path ( <i>B</i> -path1) for CO <sub>2</sub> dissociation to CO and O fragments on Ti <sub>8</sub> C <sub>12</sub> metcar obtained using B3LYP XC functional and LDZ basis set. TS1, TS2, and TS3 represents the cleavage of C-O bond and the diffusion of CO and O fragments. (b) Optimized structures for dissociation of CO <sub>2</sub> on Ti <sub>8</sub> C <sub>12</sub> metcar. Blue, grey, and red balls represent Ti, C, and O atoms, respectively. . . . . | 21 |
|----|----------------------------------------------------------------------------------------------------------------------------------------------------------------------------------------------------------------------------------------------------------------------------------------------------------------------------------------------------------------------------------------------------------------------------------------------------------------------------------|----|

## List of Tables

|    |                                                                                                                                                                                                                                                                                             |    |
|----|---------------------------------------------------------------------------------------------------------------------------------------------------------------------------------------------------------------------------------------------------------------------------------------------|----|
| S1 | Symmetry, spin multiplicity (SM), relative energy ( $E_{rel}$ ), and vibrational frequency of various isomers of pristine Ti <sub>8</sub> C <sub>12</sub> metcar optimized with LDZ basis set. . . . .                                                                                      | 8  |
| S2 | Symmetry, spin multiplicity (SM), relative energy ( $E_{rel}$ ), and vibrational frequency of various isomers of pristine Ti <sub>8</sub> C <sub>12</sub> metcar optimized with LTZ basis set and B3LYP XC functional. [ Values in parentheses are obtained with PBE functional ] . . . . . | 9  |
| S3 | Symmetry, spin multiplicity (SM), relative energy ( $E_{rel}$ ), and vibrational frequency of various isomers of pristine Ti <sub>8</sub> C <sub>12</sub> metcar optimized with Def2 basis set. . . . .                                                                                     | 10 |
| S4 | Calculated and experimental values of the geometrical and electronic characteristics of the lowest energy isomer (with C <sub>3v</sub> symmetry) of Ti <sub>8</sub> C <sub>12</sub> metcar. [ $\langle S^2 \rangle = S(S+1)$ ; $S = \text{spin}$ ] . . . . .                                | 11 |
| S5 | Calculated and experimental values of the geometrical and electronic characteristics of the lowest energy isomer (with C <sub>3v</sub> symmetry) of Ti <sub>8</sub> C <sub>12</sub> metcar. [ $\langle S^2 \rangle = S(S+1)$ ; $S = \text{spin}$ ] . . . . .                                | 12 |
| S6 | Calculated and experimental values of the geometrical and electronic characteristics of two lowest energy isomers of Ti <sub>8</sub> C <sub>12</sub> metcar (with LDZ basis set) . . . . .                                                                                                  | 13 |
| S7 | Coordinates of the lowest energy isomer of Ti <sub>8</sub> C <sub>12</sub> metcar with C <sub>3v</sub> point group symmetry obtained with PBE0 XC functional and LDZ basis set. . . . .                                                                                                     | 14 |
| S8 | Coordinates of the various isomers of Ti <sub>8</sub> C <sub>12</sub> -CO <sub>2</sub> complex optimized with PBE0 XC functional and LDZ basis set. . . . .                                                                                                                                 | 18 |
| S9 | Comparison of the relative energies of Ti <sub>8</sub> C <sub>12</sub> -CO <sub>2</sub> complexes obtained using different levels of XC functionals and LDZ basis set. . . . .                                                                                                              | 20 |

## 1 Geometric and electronic characterization of bare $\text{Ti}_8\text{C}_{12}$ cluster

In the Tables S4 and S5, we present the results obtained with LDZ and Def2 basis sets and the XC functionals PBE, PBE0, B3LYP, and TPSS for various geometric and electronic properties of the lowest energy isomer with  $C_{3v}$  symmetry. As, we can see from Tables S4 and S5 that the spin contamination for the most stable isomer of  $\text{Ti}_8\text{C}_{12}$  cluster is more pronounced with hybrid XC functionals (B3LY and PBE0) than that with GGA (PBE) and meta-GGA (TPSS) functionals, which is also in accordance with the already reported results by Schmidt and co-workers<sup>7</sup>.

We note from Table S6 that for both the isomers of  $\text{Ti}_8\text{C}_{12}$  metcar, the  $\text{Ti}^o\text{-Ti}^o$  bond distance is almost two times the distance between two  $\text{Ti}^i$  atoms because the inner Ti atoms are directly connected to each other whereas outer Ti atoms are connected through a  $C_2$  unit (see Fig. 1). We further observe from Table S6 that for the isomer with  $C_{3v}$  symmetry, the bond distances between all the  $\text{Ti}^o$  atoms are nearly equal, indicating that the outer tetrahedron becomes a sub-unit which is close to a structure with  $T_d$  symmetry. However, the distance between inner Ti atoms varies between 2.81 and 2.98 Å (with B3LYP) and 2.72 and 2.90 Å (with PBE), indicating that the inner tetrahedron gets distorted in case of isomer with  $C_{3v}$  symmetry. Unlike the isomer with  $C_{3v}$  symmetry we observe that the distances between all  $\text{Ti}^o$  atoms of the isomer with  $D_{2d}$  symmetry are equal, indicating a perfect outer tetrahedron. Whereas like  $C_{3v}$  isomer, the inner tetrahedron gets distorted for  $D_{2d}$  isomer also. It can be further seen from Table S6 that for both the isomers, the bond distance between outer Ti atom and a C atom is small relative to that between an inner Ti atom and a C atom. It indicates that outer Ti atoms strongly interact with C atoms compared to the inner Ti atoms.

The IR spectra of a cluster provides valuable information about its geometry and can also be used to identify the corresponding structure experimentally<sup>8</sup>. To this end, we present the IR spectra of the two isomers (with  $C_{3v}$  and  $D_{2d}$  symmetries) of  $\text{Ti}_8\text{C}_{12}$  cluster obtained at B3LYP level along with the corresponding experimental spectra (taken from Ref. 1) in Fig. S2. Likewise, the IR spectra of the isomer with  $C_{3v}$  symmetry obtained using PBE XC functional is displayed in Fig. S3. As, the data for experimental spectra is available within 400 - 1600  $\text{cm}^{-1}$  frequency range, so the experimental plot shown in Fig. S2 is absent beyond this frequency range. Here we wish to mention that in Fig. S2 the plots shown by magenta and blue color solid lines are broadened with Gaussian of FWHM of 8 and 40  $\text{cm}^{-1}$ , respectively.

It has been observed in the literature that fundamental vibrational frequencies obtained using *ab initio* method are generally larger than the corresponding experimentally observed modes<sup>9</sup> particularly due to the use of approximate electron correlation and the incorporation of finite basis sets. But this overestimation of the

vibrational modes, in general, does not vary from system to system, therefore we can scale the theoretical frequencies calculated using *ab initio* method in order to make good match between scaled theoretically computed data and the corresponding experimental frequencies. Keeping this in mind, we scale our theoretically computed frequencies with B3LYP XC functional by a factor of 0.9297 so as to obtain a good agreement between our data and the experimental peak at  $1395\text{ cm}^{-1}$  corresponding to C-C stretching<sup>10</sup>. The frequency scaling factor which we used in our work lies between the corresponding scaling factors recommended for the HF/6-31G(d) (0.8929) and MP2/6-31G(d) (0.9427) levels of theories<sup>11</sup>. This scaling of frequencies does not affect the overall shapes of the IR spectra, and we can see from the blue plots shown in Fig. S2 that our spectra match very well with the experimental one in the higher frequency region. Further, the experimental spectrum shows the presence of a shoulder peak near  $1340\text{ cm}^{-1}$ , which is absent for  $D_{2d}$  isomer but such peak can be seen very clearly at  $1357\text{ cm}^{-1}$  in the IR spectra of  $C_{3v}$  structure displayed in Fig. S2. Moreover, in the low frequency region there is a small peak at  $521\text{ cm}^{-1}$  in the experimental spectrum which corresponds to the stretching of Ti-C bond. Similar small peaks are also observed in our computed frequency spectra (scaled) at  $577$  and  $571\text{ cm}^{-1}$  for  $C_{3v}$  and  $D_{2d}$  isomers, respectively. We further observe a small peak nearly at  $440\text{ cm}^{-1}$ , corresponding to Ti-Ti bond stretching, for both the isomers of  $\text{Ti}_8\text{C}_{12}$  cluster, which is non-degenerate in case of  $C_{3v}$  structure and doubly degenerate for  $D_{2d}$  isomer. It can also be noted that in our calculated spectra there are more peaks in the frequency region below  $400\text{ cm}^{-1}$  which are absent in the corresponding experimental plot. However, these small peaks may appear in the experimental spectra also if the experiment is performed for the frequencies below  $400\text{ cm}^{-1}$ . From the above results we infer that overall the IR spectra of both the isomers of  $\text{Ti}_8\text{C}_{12}$  metcar match quite well with the experimental results. However, the presence of a shoulder peak in the high frequency region is only reproduced for the isomer with  $C_{3v}$  symmetry. Therefore, we conclude that the isomer with  $C_{3v}$  symmetry is most probably the lowest energy isomer for  $\text{Ti}_8\text{C}_{12}$  metcar.

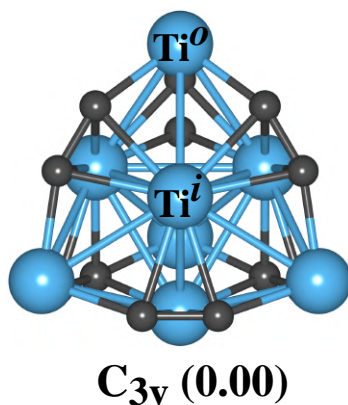

**Fig. S1** Optimized structures of pristine  $\text{Ti}_8\text{C}_{12}$  metcar using LDZ and PBE XC functional.  $\text{Ti}^o$  and  $\text{Ti}^i$  correspond to the Ti atoms of the outer and inner tetrahedrons, respectively. The symmetry of the isomer is written at the bottom. The value of spin multiplicity ( $2S+1$ ) of this isomer is 3. Blue and grey balls represent Ti and C atoms, respectively.

## 2 IR spectra of the $\text{CO}_2$ molecule chemisorbed onto $\text{Ti}_8\text{C}_{12}$ metcar

In Fig. S6 we display the IR spectra for isolated  $\text{CO}_2$  molecule along with the corresponding spectra for chemisorbed  $\text{CO}_2$  on both the isomers (A and B) of  $\text{Ti}_8\text{C}_{12}\text{-CO}_2$  complex. We find that a free  $\text{CO}_2$  molecule possess two distinct vibrational modes corresponding to asymmetric and symmetric stretching of C-O bonds (centred at  $2421\text{ cm}^{-1}$  and  $1378\text{ cm}^{-1}$ , respectively), and two bending modes which are centred at  $675\text{ cm}^{-1}$ , calculated with B3LYP XC functional. Since symmetric stretching of the C-O bonds of linear  $\text{CO}_2$  molecule does not change the dipole moment so this mode is IR inactive for free  $\text{CO}_2$  and hence this band is absent from the IR spectra of the isolated  $\text{CO}_2$  (see Fig. S6). We observe from the IR spectra of  $\text{CO}_2$  molecule adsorbed on isomer A of  $\text{Ti}_8\text{C}_{12}\text{-CO}_2$  complex that there is a blue-shift in the signal corresponding to the bending of  $\text{CO}_2$ , that is, bending mode is now centred at  $765\text{ cm}^{-1}$ . On the other hand, a red-shift is observed in the asymmetric stretching of C-O bonds, meaning this mode is shifted to the lower frequency value ( $1748\text{ cm}^{-1}$ ) in comparison to the linear  $\text{CO}_2$  molecule ( $2421\text{ cm}^{-1}$ ). Further, for A isomer an additional signal, centred at  $1087\text{ cm}^{-1}$ , can be seen from Fig. S6. This additional signal for chemisorbed  $\text{CO}_2$  represents a symmetrical stretching of C-O bond and its occurrence in  $\text{Ti}_8\text{C}_{12}\text{-CO}_2$  cluster-molecule complex is also consistent with the earlier theoretical and experimental IR spectra of  $\text{CO}_2$  chemisorbed onto four-atom monometallic and bimetallic clusters<sup>12,13</sup>. This additional peak is red shifted in comparison to the corresponding peak which occurs at  $1378\text{ cm}^{-1}$  for a free  $\text{CO}_2$  molecule. It can be seen from IR spectra of isomer A that there are additional signals in between asymmetric and symmetric stretching modes of  $\text{CO}_2$  which correspond to C-C stretching of the C atoms which are present in the titanium metcar. The new signals appearing between

symmetric stretching and bending modes represent the mixed vibrations within CO<sub>2</sub> molecule and that of C-C bond between the C atom of CO<sub>2</sub> and C atom of the titanium cluster. The series of small peaks in lower frequency region lying on the left side of bending mode of CO<sub>2</sub> indicate the stretching of Ti-C bonds (Ti: Ti<sup>o</sup>/Ti<sup>i</sup>) of metcar.

For isomer *B*, we find a blue shift in the signal corresponding to the mode representing the bending of chemisorbed CO<sub>2</sub> molecule. This signal is centred at 729 cm<sup>-1</sup> and at this frequency small vibrations indicating the stretching of Ti<sup>i</sup>-C bonds of Ti<sub>8</sub>C<sub>12</sub>-CO<sub>2</sub> complex are also present. We note that the asymmetric stretching mode for CO<sub>2</sub> molecule adsorbed on isomer *B* appears at a much lower frequency (1366 cm<sup>-1</sup>) in comparison to the corresponding mode in isomer *A* (1748 cm<sup>-1</sup>). Further, for isomer *B* we observe an additional signal centred at 922 cm<sup>-1</sup>. This signal corresponds to the mixed vibrations of the symmetric stretching of C-O bond of chemisorbed CO<sub>2</sub> and the C-C bond between C atom of adsorbed CO<sub>2</sub> and C atom of Ti<sub>8</sub>C<sub>12</sub> cluster. Since the CO<sub>2</sub> molecule adsorbed on isomer *B* is coordinated with more number of atoms of Ti<sub>8</sub>C<sub>12</sub> cluster than that on isomer *A*, this may be the reason behind the additional C-C and Ti<sup>i</sup>-C bonds vibrations appearing at symmetric stretching and bending modes in case of isomer *B*. It can further be seen from the IR spectra of isomer *B* that peaks on the right side of asymmetric stretching mode belongs to the stretching of C<sub>2</sub> units of metcar. However, a strong signal at 1174 cm<sup>-1</sup> corresponds to the mixed vibrations of the asymmetric stretching of adsorbed CO<sub>2</sub> molecule and the C-C bond between the C atom of CO<sub>2</sub> and C atom of metcar with which CO<sub>2</sub> is coordinated. From these results for IR spectra of chemisorbed and linear CO<sub>2</sub> molecule, we infer that the red shifted additional signal, indicating the symmetric stretching of C-O bonds, occurred approximately at 1000 cm<sup>-1</sup> for isomers *A* and *B* can be used as a signature for characterizing the activation of CO<sub>2</sub> adsorbed onto Ti<sub>8</sub>C<sub>12</sub> metcar.

**Table S1** Symmetry, spin multiplicity (SM), relative energy ( $E_{rel}$ ), and vibrational frequency of various isomers of pristine  $\text{Ti}_8\text{C}_{12}$  metcar optimized with LDZ basis set.

| symmetry<br>(initial structure) | method | SM<br>( $2S+1$ ) | symmetry<br>(optimized structure) | $E_{rel}$<br>(eV) | frequency <sup>a</sup><br>( $\text{cm}^{-1}$ ) |
|---------------------------------|--------|------------------|-----------------------------------|-------------------|------------------------------------------------|
| $\text{C}_{3v}$                 | PBE    | 3                | $\text{C}_{3v}$                   | 0.00              | all +ve                                        |
|                                 | PBE0   | 3                | $\text{C}_{3v}$                   | 0.00              | all +ve                                        |
|                                 | B3LYP  | 3                | $\text{C}_{3v}$                   | 0.00              | all +ve                                        |
|                                 | TPSS   | 3                | $\text{C}_{3v}$                   | 0.00              | all +ve                                        |
| $\text{C}_{2v}$                 | PBE    | 3                | $\text{C}_{2v}$                   | 0.11              | -177, -172                                     |
|                                 | PBE0   | 3                | $\text{C}_s$                      | 0.07              | -767                                           |
|                                 | B3LYP  | 1                | $\text{C}_{2v}$                   | 0.53              | all +ve                                        |
|                                 | TPSS   | 1                | $\text{C}_s$                      | 0.25              | -55                                            |
| $\text{D}_{2d}$                 | PBE    | 5                | $\text{C}_s$                      | 1.33              | all +ve                                        |
|                                 | PBE0   | 3                | $\text{D}_{2d}$                   | 0.32              | all +ve                                        |
|                                 | B3LYP  | 3                | $\text{D}_{2d}$                   | 0.29              | all +ve                                        |
|                                 | TPss   | 3                | $\text{C}_s$                      | 0.03              | -141                                           |
| $\text{D}_2$                    | PBE    | 5                | $\text{C}_1$                      | 1.33              | all +ve                                        |
|                                 | PBE0   | 3                | $\text{C}_1$                      | 0.32              | all +ve                                        |
|                                 | B3LYP  | 3                | $\text{C}_1$                      | 0.29              | all +ve                                        |
|                                 | TPSS   | 3                | $\text{C}_1$                      | 0.17              | all +ve                                        |
| $\text{D}_{2h}$                 | PBE    | 5                | $\text{C}_1$                      | 2.81              | all +ve                                        |
|                                 | PBE0   | 1                | $\text{C}_1$                      | 4.24              | all +ve                                        |
|                                 | B3LYP  | 1                | $\text{C}_I$                      | 3.06              | all +ve                                        |
|                                 | TPSS   | 1                | $\text{C}_I$                      | 2.85              | all +ve                                        |
| $\text{T}_d$                    | PBE    | 3                | $\text{C}_1$                      | 0.11              | -489, -488                                     |
|                                 | PBE0   | 3                | $\text{C}_1$                      | 0.32              | all +ve                                        |
|                                 | B3LYP  | 3                | $\text{D}_{2d}$                   | 0.29              | all +ve                                        |
|                                 | TPSS   | 3                | $\text{C}_1$                      | 0.00              | all +ve                                        |
| $\text{T}_h$                    | PBE    | 5                | $\text{C}_I$                      | 2.84              | all +ve                                        |
|                                 | PBE0   | 3                | $\text{C}_I$                      | 3.20              | -136                                           |
|                                 | B3LYP  | 1                | $\text{C}_I$                      | 3.20              | -169                                           |
|                                 | TPSS   | 3                | $\text{C}_I$                      | 2.74              | all +ve                                        |

<sup>a</sup> "all +ve" means all the corresponding vibrational frequency modes are real. Negative numbers represent the imaginary frequency modes of the corresponding structure.



**Table S2** Symmetry, spin multiplicity (SM), relative energy ( $E_{rel}$ ), and vibrational frequency of various isomers of pristine  $Ti_8C_{12}$  metcar optimized with LTZ basis set and B3LYP XC functional. [ Values in parentheses are obtained with PBE functional ]

| symmetry<br>(initial structure) | SM<br>(2S+1) | symmetry<br>(optimized structure) | $E_{rel}$<br>(eV) | frequency<br>( $cm^{-1}$ ) |
|---------------------------------|--------------|-----------------------------------|-------------------|----------------------------|
| $C_{3v}$                        | 3 (3)        | $C_{3v}$ ( $C_{3v}$ )             | 0.00 (0.00)       | all +ve (all +ve)          |
| $C_{2v}$                        | 3 (3)        | $C_{2v}$ ( $C_{2v}$ )             | 0.29 (0.01)       | all +ve (all +ve)          |
| $D_{2d}$                        | 3 (3)        | $C_1$ ( $C_s$ )                   | 0.29 (0.00)       | all +ve (all +ve)          |
| $D_2$                           | 3 (3)        | $C_1$ ( $C_1$ )                   | 0.29 (0.01)       | all +ve (all +ve)          |
| $D_{2h}$                        | 1 (5)        | $C_I$ ( $C_I$ )                   | 3.67 (2.52)       | all +ve (all +ve)          |
| $T_d$                           | 1 (5)        | $C_1$ ( $C_1$ )                   | 0.54 (1.29)       | all +ve (all +ve)          |
| $T_h$                           | 1 (3)        | $C_I$ ( $C_I$ )                   | 2.91 (2.24)       | -156 (all +ve)             |

<sup>a</sup> "all +ve" means all the corresponding vibrational frequency modes are real. Negative numbers represent the imaginary frequency modes of the corresponding structure.

**Table S3** Symmetry, spin multiplicity (SM), relative energy ( $E_{rel}$ ), and vibrational frequency of various isomers of pristine  $\text{Ti}_8\text{C}_{12}$  metcar optimized with Def2 basis set.

| symmetry<br>(initial structure) | method | SM<br>(2S+1) | symmetry<br>(optimized structure) | $E_{rel}$<br>(eV) | frequency <sup>a</sup><br>( $\text{cm}^{-1}$ ) |
|---------------------------------|--------|--------------|-----------------------------------|-------------------|------------------------------------------------|
| $\text{C}_{3v}$                 | PBE    | 3            | $\text{C}_{3v}$                   | 0.00              | all +ve                                        |
|                                 | PBE0   | 3            | $\text{C}_{3v}$                   | 0.00              | all +ve                                        |
|                                 | B3LYP  | 3            | $\text{C}_{3v}$                   | 0.00              | all +ve                                        |
|                                 | TPSS   | 3            | $\text{C}_{3v}$                   | 0.00              | all +ve                                        |
| $\text{C}_{2v}$                 | PBE    | 3            | $\text{C}_s$                      | 0.03              | -163, -152                                     |
|                                 | PBE0   | 1            | $\text{C}_s$                      | 0.56              | all +ve                                        |
|                                 | B3LYP  | 1            | $\text{C}_s$                      | 0.50              | all +ve                                        |
|                                 | TPSS   | 3            | $\text{C}_s$                      | 0.11              | -205, -127                                     |
| $\text{D}_{2d}$                 | PBE    | 3            | $\text{C}_s$                      | 0.01              | -109                                           |
|                                 | PBE0   | 3            | $\text{C}_s$                      | 0.00              | all +ve                                        |
|                                 | B3LYP  | 3            | $\text{C}_s$                      | 0.00              | all +ve                                        |
|                                 | TPSS   | 3            | $\text{C}_s$                      | 0.02              | -135                                           |
| $\text{D}_2$                    | PBE    | 3            | $\text{C}_1$                      | 0.00              | all +ve                                        |
|                                 | PBE0   | 3            | $\text{C}_1$                      | 0.00              | all +ve                                        |
|                                 | B3LYP  | 3            | $\text{C}_1$                      | 0.27              | all +ve                                        |
|                                 | TPSS   | 3            | $\text{C}_1$                      | 0.11              | -203, -121                                     |
| $\text{D}_{2h}$                 | PBE    | 3            | $\text{C}_I$                      | 2.31              | all +ve                                        |
|                                 | PBE0   | 3            | $\text{C}_1$                      | 1.39              | all +ve                                        |
|                                 | B3LYP  | 3            | $\text{C}_1$                      | 1.45              | all +ve                                        |
|                                 | TPSS   | 3            | $\text{C}_I$                      | 2.34              | all +ve                                        |
| $\text{T}_d$                    | PBE    | 3            | $\text{C}_1$                      | 0.00              | all +ve                                        |
|                                 | PBE0   | 3            | $\text{C}_1$                      | 0.00              | all +ve                                        |
|                                 | B3LYP  | 3            | $\text{C}_1$                      | 0.27              | all +ve                                        |
|                                 | TPSS   | 3            | $\text{C}_s$                      | 0.11              | -205, -127                                     |
| $\text{T}_h$                    | PBE    | 3            | $\text{C}_I$                      | 2.10              | all +ve                                        |
|                                 | PBE0   | 1            | $\text{C}_I$                      | 3.94              | all +ve                                        |
|                                 | B3LYP  | 1            | $\text{C}_1$                      | 1.78              | all +ve                                        |
|                                 | TPSS   | 3            | $\text{C}_I$                      | 2.40              | -787                                           |

<sup>a</sup> "all +ve" means all the corresponding vibrational frequency modes are real. Negative numbers represent the imaginary frequency modes of the corresponding structure.

**Table S4** Calculated and experimental values of the geometrical and electronic characteristics of the lowest energy isomer (with  $C_{3v}$  symmetry) of  $Ti_8C_{12}$  metcar. [  $\langle S^2 \rangle = S(S+1)$ ;  $S = \text{spin}$  ]

| property <sup>a</sup>                | LDZ (Ti: LANL2DZ; C, O: TZVP) |                             |                             |                             | reported                                      |
|--------------------------------------|-------------------------------|-----------------------------|-----------------------------|-----------------------------|-----------------------------------------------|
|                                      | PBE                           | PBE0                        | B3LYP                       | TPSS                        |                                               |
| SM ( $2S+1$ )                        | 3                             | 3                           | 3                           | 3                           | 1 <sup>2</sup>                                |
| $\langle S^2 \rangle$                | 2.0213                        | 2.1779                      | 2.1736                      | 2.0340                      |                                               |
| State                                | <sup>3</sup> A <sub>1</sub>   | <sup>3</sup> A <sub>1</sub> | <sup>3</sup> A <sub>1</sub> | <sup>3</sup> A <sub>1</sub> |                                               |
| Ti <sup>o</sup> -Ti <sup>o</sup> (Å) | 4.87-4.90                     | 4.83-4.84                   | 4.85-4.86                   | 4.86-4.89                   | 4.92-4.94 <sup>2</sup>                        |
| Ti <sup>i</sup> -Ti <sup>i</sup> (Å) | 2.72-2.90                     | 2.77-2.94                   | 2.81-2.98                   | 2.70-2.90                   | 2.77-2.96 <sup>2</sup>                        |
| Ti <sup>o</sup> -Ti <sup>i</sup> (Å) | 2.88-2.93                     | 2.90-2.91                   | 2.88-2.93                   | 2.90-2.93                   | 2.92-2.97 <sup>2</sup>                        |
| Ti <sup>o</sup> -C (Å)               | 1.95-1.96                     | 1.94                        | 1.96                        | 1.96-1.97                   | 1.99-2.00 <sup>2</sup>                        |
| Ti <sup>i</sup> -C (Å)               | 2.20-2.22                     | 2.20-2.21                   | 2.21-2.23                   | 2.21-2.23                   | 2.24-2.27 <sup>2</sup>                        |
| C-C (Å)                              | 1.34                          | 1.33                        | 1.32-1.33                   | 1.34                        | 1.34-1.35 <sup>2</sup>                        |
| BE (eV)                              | 6.35                          | 5.85                        | 5.62                        | 6.13                        | 6.36 <sup>2</sup>                             |
| E <sub>hl</sub> (eV)                 | 0.22                          | 1.88                        | 1.60                        | 0.39                        | 0.12 <sup>3</sup>                             |
| VIP (eV)                             | 4.77                          | 5.24                        | 4.91                        | 4.73                        | 4.61 <sup>3</sup> , [4.9±0.2 <sup>4</sup> ]   |
| VEA (eV)                             | 0.99                          | 0.82                        | 0.51                        | 0.83                        | 0.89 <sup>3</sup> , [1.16±0.05 <sup>5</sup> ] |

<sup>a</sup>Ti<sup>o</sup> and Ti<sup>i</sup> correspond to Ti atoms of the outer and inner tetrahedrons, respectively. All the reported numbers are taken from the theoretical calculations except for the numerical values given within the square bracket which correspond to the experimental data. The ideal value of  $\langle S^2 \rangle$  is 2. "State" denotes the electronic state of the cluster.

Ref. 2: Method - RPBE, Basis - Double numerical plus d-functions

Ref. 3: Method - DFT, Basis - Gaussian basis set centered at atoms

Ref. 4: Method - Near-threshold Photoionization

Ref. 5: Method - Photoelectron spectroscopy

Ref. 6: Method - Spin-polarized DFT, Basis - DZVP

**Table S5** Calculated and experimental values of the geometrical and electronic characteristics of the lowest energy isomer (with  $C_{3v}$  symmetry) of  $Ti_8C_{12}$  metcar. [  $\langle S^2 \rangle = S(S+1)$ ;  $S = \text{spin}$  ]

| property <sup>a</sup>                | Def2 (Ti: Def2TZVP; C, O: TZVP) |                             |                             |                             | reported                                      |
|--------------------------------------|---------------------------------|-----------------------------|-----------------------------|-----------------------------|-----------------------------------------------|
|                                      | PBE                             | PBE0                        | B3LYP                       | TPSS                        |                                               |
| SM ( $2S+1$ )                        | 3                               | 3                           | 3                           | 3                           | 1 <sup>2</sup>                                |
| $\langle S^2 \rangle$                | 2.0186                          | 2.1775                      | 2.1582                      | 2.0268                      |                                               |
| State                                | <sup>3</sup> A <sub>1</sub>     | <sup>3</sup> A <sub>1</sub> | <sup>3</sup> A <sub>1</sub> | <sup>3</sup> A <sub>1</sub> |                                               |
| Ti <sup>o</sup> -Ti <sup>o</sup> (Å) | 4.88-4.91                       | 4.84-4.85                   | 4.86-4.88                   | 4.88-4.90                   | 4.92-4.94 <sup>2</sup>                        |
| Ti <sup>i</sup> -Ti <sup>i</sup> (Å) | 2.73-2.91                       | 2.79-2.95                   | 2.83-2.99                   | 2.71-2.90                   | 2.77-2.96 <sup>2</sup>                        |
| Ti <sup>o</sup> -Ti <sup>i</sup> (Å) | 2.91-2.94                       | 2.91-2.92                   | 2.93-2.94                   | 2.91-2.94                   | 2.92-2.97 <sup>2</sup>                        |
| Ti <sup>o</sup> -C (Å)               | 1.96-1.97                       | 1.95                        | 1.97                        | 1.97-1.98                   | 1.99-2.00 <sup>2</sup>                        |
| Ti <sup>i</sup> -C (Å)               | 2.22-2.23                       | 2.21-2.22                   | 2.23-2.24                   | 2.22-2.24                   | 2.24-2.27 <sup>2</sup>                        |
| C-C (Å)                              | 1.34                            | 1.33                        | 1.33                        | 1.34                        | 1.34-1.35 <sup>2</sup>                        |
| BE (eV)                              | 6.40                            | 5.89                        | 5.66                        | 6.19                        | 6.36 <sup>2</sup>                             |
| E <sub>hl</sub> (eV)                 | 0.12                            | 1.80                        | 1.49                        | 0.28                        | 0.12 <sup>3</sup>                             |
| VIP (eV)                             | 4.57                            | 4.55                        | 4.62                        | 4.51                        | 4.61 <sup>3</sup> , [4.9±0.2 <sup>4</sup> ]   |
| VEA (eV)                             | 0.92                            | 0.73                        | 0.80                        | 0.74                        | 0.89 <sup>3</sup> , [1.16±0.05 <sup>5</sup> ] |

<sup>a</sup>Ti<sup>o</sup> and Ti<sup>i</sup> correspond to Ti atoms of the outer and inner tetrahedrons, respectively. All the reported numbers are taken from the theoretical calculations except for the numerical values given within the square bracket which correspond to the experimental data. The ideal value of  $\langle S^2 \rangle$  is 2. "State" denotes the electronic state of the cluster.

Ref. 2: Method - RPBE, Basis - Double numerical plus d-functions

Ref. 3: Method - DFT, Basis - Gaussian basis set centered at atoms

Ref. 4: Method - Near-threshold Photoionization

Ref. 5: Method - Photoelectron spectroscopy

Ref. 6: Method - Spin-polarized DFT, Basis - DZVP

**Table S6** Calculated and experimental values of the geometrical and electronic characteristics of two lowest energy isomers of  $\text{Ti}_8\text{C}_{12}$  metcar (with LDZ basis set)

| symmetry        | property <sup>a</sup>                | B3LYP     | PBE       | PBE0      | reported                                      |
|-----------------|--------------------------------------|-----------|-----------|-----------|-----------------------------------------------|
| $\text{C}_{3v}$ | SM (2S+1)                            | 3         | 3         | 3         | 1 <sup>2</sup>                                |
|                 | Ti <sup>o</sup> -Ti <sup>o</sup> (Å) | 4.85-4.86 | 4.87-4.90 | 4.83-4.84 | 4.92-4.94 <sup>2</sup>                        |
|                 | Ti <sup>i</sup> -Ti <sup>i</sup> (Å) | 2.81-2.98 | 2.72-2.90 | 2.77-2.94 | 2.77-2.96 <sup>2</sup>                        |
|                 | Ti <sup>o</sup> -Ti <sup>i</sup> (Å) | 2.88-2.93 | 2.88-2.93 | 2.90-2.91 | 2.92-2.97 <sup>2</sup>                        |
|                 | Ti <sup>o</sup> -C (Å)               | 1.96      | 1.95-1.96 | 1.94      | 1.99-2.00 <sup>2</sup>                        |
|                 | Ti <sup>i</sup> -C (Å)               | 2.21-2.23 | 2.20-2.22 | 2.20-2.21 | 2.24-2.27 <sup>2</sup>                        |
|                 | C-C (Å)                              | 1.32-1.33 | 1.34      | 1.33      | 1.34-1.35 <sup>2</sup>                        |
|                 | BE (eV)                              | 5.62      | 6.35      | 5.85      | 6.36 <sup>2</sup>                             |
|                 | E <sub>hl</sub> (eV)                 | 1.60      | 0.22      | 1.88      | 0.12 <sup>3</sup>                             |
|                 | VIP (eV)                             | 4.91      | 4.77      | 5.24      | 4.61 <sup>3</sup> , [4.9±0.2 <sup>4</sup> ]   |
|                 | VEA (eV)                             | 0.51      | 0.99      | 0.82      | 0.89 <sup>3</sup> , [1.16±0.05 <sup>5</sup> ] |
| $\text{D}_{2d}$ | SM (2S+1)                            | 3         |           | 3         | 1 <sup>6</sup>                                |
|                 | Ti <sup>o</sup> -Ti <sup>o</sup> (Å) | 4.86      |           | 4.83-4.84 |                                               |
|                 | Ti <sup>i</sup> -Ti <sup>i</sup> (Å) | 2.86-2.90 |           | 2.82-2.86 |                                               |
|                 | Ti <sup>o</sup> -Ti <sup>i</sup> (Å) | 2.88-2.92 |           | 2.87-2.90 | 2.77-2.81 <sup>6</sup>                        |
|                 | Ti <sup>o</sup> -C (Å)               | 1.95-1.96 |           | 1.93-1.94 | 1.95-2.09 <sup>6</sup>                        |
|                 | Ti <sup>i</sup> -C (Å)               | 2.21-2.22 |           | 2.19-2.20 | 2.04-2.08 <sup>6</sup>                        |
|                 | C-C (Å)                              | 1.32-1.33 |           | 1.33      | 1.36-1.37 <sup>6</sup>                        |
|                 | BE (eV)                              | 5.60      |           | 5.84      | 6.54 <sup>6</sup>                             |
|                 | E <sub>hl</sub> (eV)                 | 1.33      |           | 1.59      | 0.13 <sup>3</sup>                             |
|                 | VIP (eV)                             | 4.53      |           | 4.41      | 4.51 <sup>3</sup> , [4.9±0.2 <sup>4</sup> ]   |
|                 | VEA (eV)                             | 0.97      |           | 0.71      | 0.93 <sup>3</sup> , [1.16±0.05 <sup>5</sup> ] |

<sup>a</sup>Ti<sup>o</sup> and Ti<sup>i</sup> correspond to Ti atoms of the outer and inner tetrahedrons, respectively. All the reported numbers are taken from the theoretical calculations except for the numerical values given within the square bracket which correspond to the experimental data.

Ref. 2: Method - RPBE, Basis - Double numerical plus d-functions

Ref. 3: Method - DFT, Basis - Gaussian basis set centered at atoms

Ref. 4: Method - Near-threshold Photoionization

Ref. 5: Method - Photoelectron spectroscopy

Ref. 6: Method - Spin-polarized DFT, Basis - DZVP

**Table S7** Coordinates of the lowest energy isomer of  $\text{Ti}_8\text{C}_{12}$  metcar with  $\text{C}_{3v}$  point group symmetry obtained with PBE0 XC functional and LDZ basis set.

|    | $\text{Ti}_8\text{C}_{12} (\text{C}_{3v})$ |           |           |
|----|--------------------------------------------|-----------|-----------|
| C  | 2.145450                                   | -0.469543 | -1.486802 |
| C  | 1.479361                                   | -1.623243 | -1.486802 |
| C  | 0.000000                                   | -1.701268 | 1.993911  |
| C  | 0.000000                                   | -2.477238 | 0.916361  |
| C  | -1.479361                                  | -1.623243 | -1.486802 |
| C  | -2.145450                                  | -0.469543 | -1.486802 |
| C  | 0.666089                                   | 2.092786  | -1.486802 |
| C  | -0.666089                                  | 2.092786  | -1.486802 |
| C  | -2.145351                                  | 1.238619  | 0.916361  |
| C  | -1.473341                                  | 0.850634  | 1.993911  |
| C  | 2.145351                                   | 1.238619  | 0.916361  |
| C  | 1.473341                                   | 0.850634  | 1.993911  |
| Ti | 0.000000                                   | 1.703349  | 0.584320  |
| Ti | -2.424077                                  | 1.399542  | -1.005121 |
| Ti | 2.424077                                   | 1.399542  | -1.005121 |
| Ti | 0.000000                                   | 0.000000  | 2.941214  |
| Ti | 1.475143                                   | -0.851674 | 0.584320  |
| Ti | 0.000000                                   | 0.000000  | -1.626993 |
| Ti | -1.475143                                  | -0.851674 | 0.584320  |
| Ti | -0.000000                                  | -2.799083 | -1.005121 |

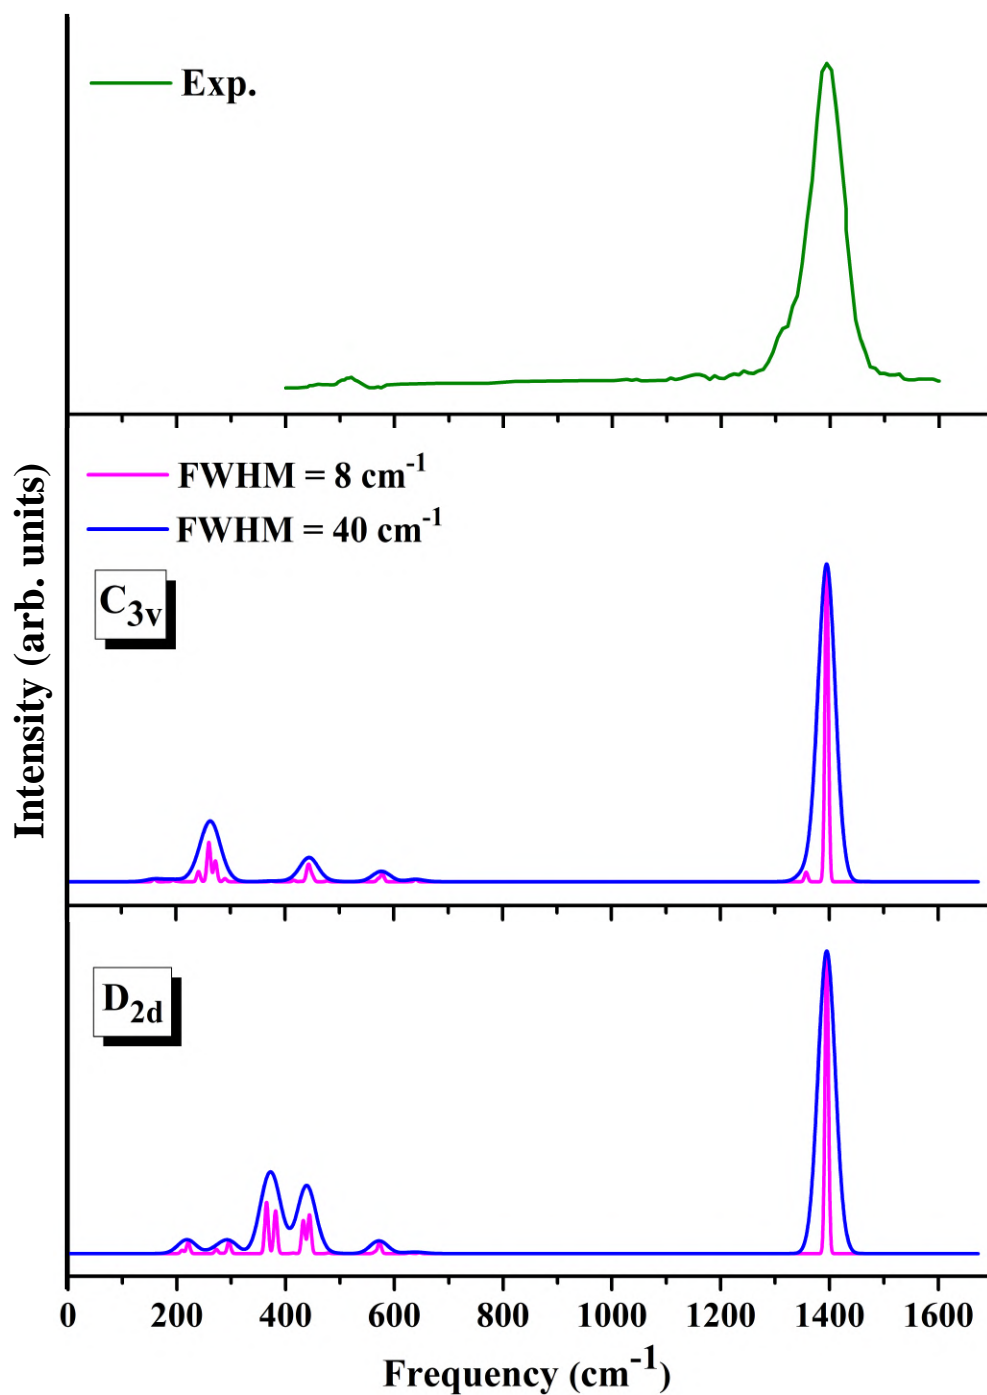

**Fig. S2** Infrared spectra of two lowest energy isomers of  $\text{Ti}_8\text{C}_{12}$  met-car obtained using B3LYP XC functional and LDZ basis set together with the experimental data taken from Ref. 1.

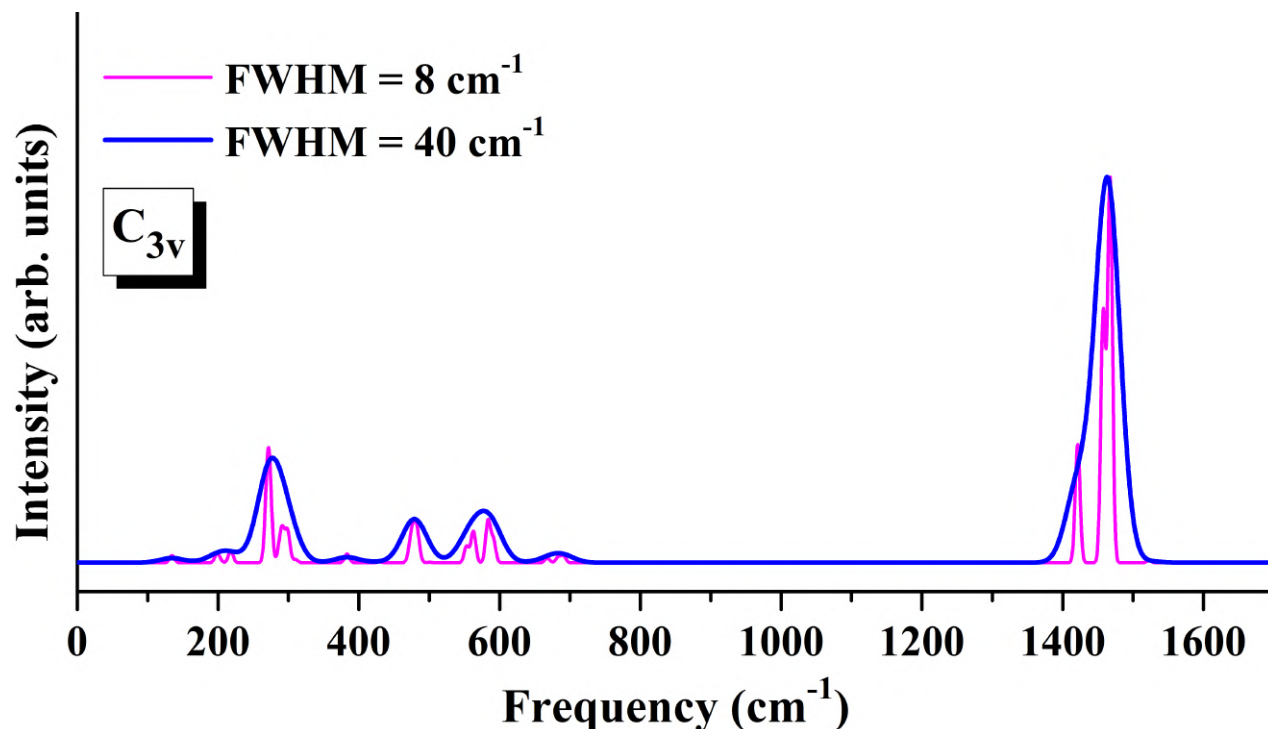

**Fig. S3** Infrared spectra of the lowest energy isomer of  $\text{Ti}_8\text{C}_{12}$  met-car obtained using PBE XC functional and LDZ basis set.

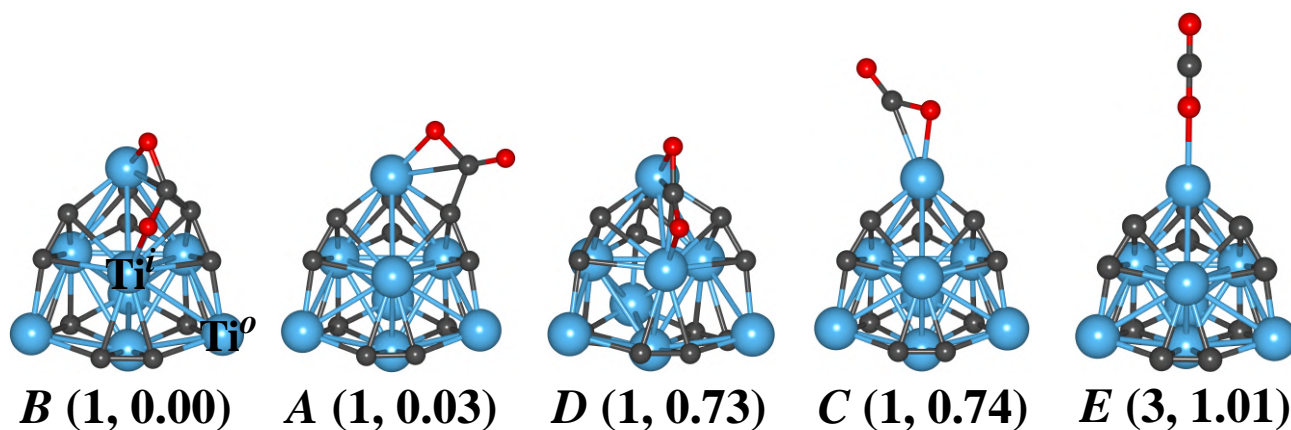

**Fig. S4** Optimized structures of  $\text{Ti}_8\text{C}_{12}\text{-CO}_2$  cluster-molecule complex using PBE XC functional and LDZ basis set. The first number within the parentheses corresponds to the spin multiplicity ( $2S+1$ ) and the second number denotes the relative energy (in eV) of the  $\text{Ti}_8\text{C}_{12}\text{-CO}_2$  complexes with respect to the most stable isomer *B*.  $\text{Ti}^o$  and  $\text{Ti}^i$  correspond to the Ti atoms of the outer and inner tetrahedrons, respectively. Blue, grey, and red balls represent Ti, C, and O atoms, respectively.



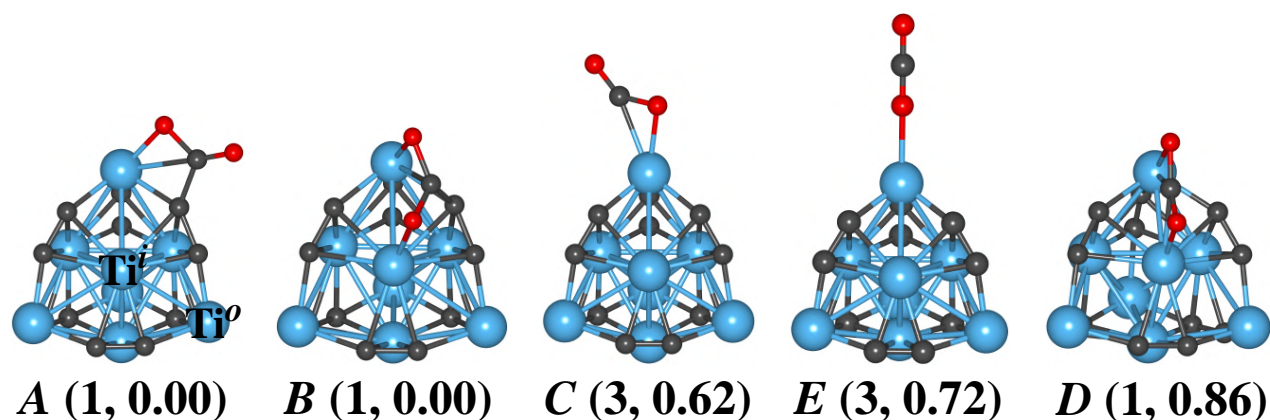

**Fig. S5** Optimized structures of  $\text{Ti}_8\text{C}_{12}\text{-CO}_2$  cluster-molecule complex using PBE0 XC functional and LDZ basis set. The first number within the parentheses corresponds to the spin multiplicity ( $2S+1$ ) and the second number denotes the relative energy (in eV) of the  $\text{Ti}_8\text{C}_{12}\text{-CO}_2$  complexes with respect to the most stable isomer A.  $\text{Ti}^o$  and  $\text{Ti}^i$  correspond to the Ti atoms of the outer and inner tetrahedrons, respectively. Blue, grey, and red balls represent Ti, C, and O atoms, respectively.

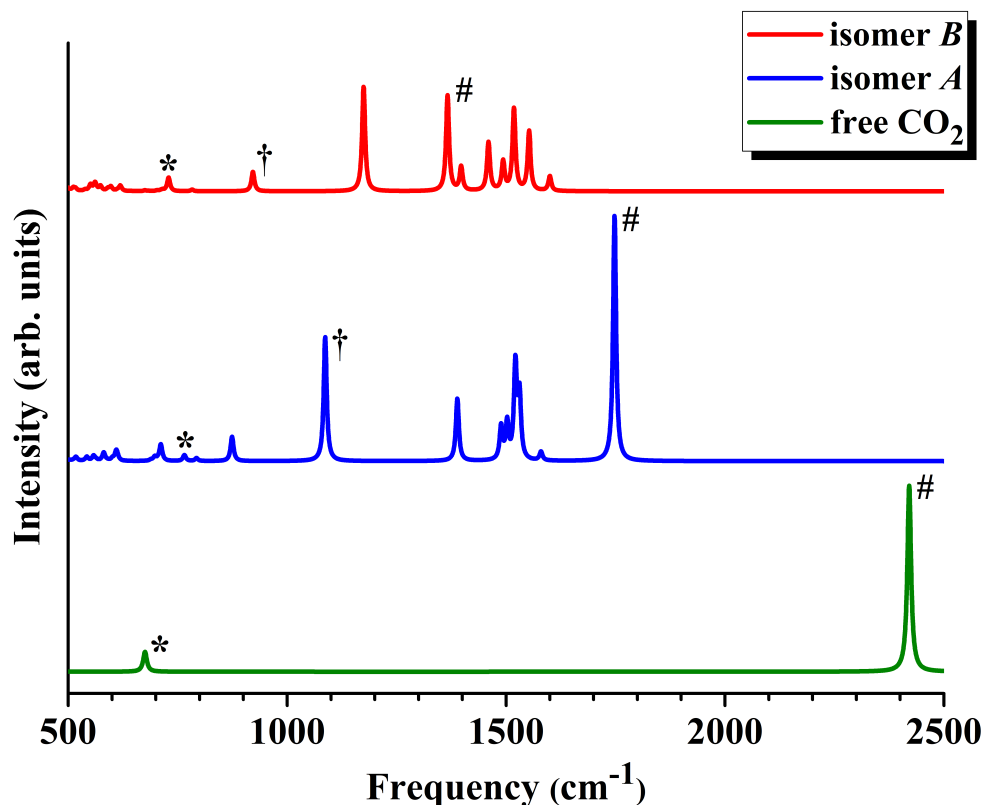

**Fig. S6** Infrared spectra for the lowest energy structures of  $\text{Ti}_8\text{C}_{12}\text{-CO}_2$  complex together with the corresponding spectra for gas phase  $\text{CO}_2$  obtained with B3LYP functional and LDZ basis set. The symbols (\*), (†), and (#) separately denotes the bending, symmetric stretching, and asymmetric stretching modes of  $\text{CO}_2$  molecule.

**Table S8** Coordinates of the various isomers of  $\text{Ti}_8\text{C}_{12}\text{-CO}_2$  complex optimized with PBE0 XC functional and LDZ basis set.

| $\text{Ti}_8\text{C}_{12}\text{-CO}_2$ (A) |           |           |           |
|--------------------------------------------|-----------|-----------|-----------|
| C                                          | -1.456581 | -1.628280 | -1.444177 |
| C                                          | -2.129899 | -0.485854 | -1.452797 |
| C                                          | -1.438846 | 0.861745  | 1.979177  |
| C                                          | -2.107058 | 1.216278  | 0.893446  |
| C                                          | -0.722068 | 2.056116  | -1.557222 |
| C                                          | 0.605923  | 2.046284  | -1.555411 |
| C                                          | 1.449833  | -1.628971 | -1.529417 |
| C                                          | 2.084501  | -0.462435 | -1.536481 |
| C                                          | 2.086391  | 1.246609  | 0.820074  |
| C                                          | 1.598745  | 0.968681  | 2.076095  |
| C                                          | 0.028058  | -2.406394 | 0.920780  |
| C                                          | 0.034420  | -1.637962 | 1.998038  |
| Ti                                         | 1.415035  | -0.743469 | 0.517865  |
| Ti                                         | 2.355670  | 1.391225  | -1.047444 |
| Ti                                         | 0.019201  | -2.783652 | -0.972172 |
| Ti                                         | 0.050769  | 0.063061  | 2.966703  |
| Ti                                         | -1.421818 | -0.822747 | 0.594281  |
| Ti                                         | -0.035486 | -0.023922 | -1.823857 |
| Ti                                         | 0.022218  | 1.619738  | 0.500032  |
| Ti                                         | -2.428886 | 1.370043  | -1.003513 |
| C                                          | 2.119764  | 1.286242  | 3.465655  |
| O                                          | 3.128371  | 1.882768  | 3.741279  |
| O                                          | 1.243958  | 0.776616  | 4.334234  |
| $\text{Ti}_8\text{C}_{12}\text{-CO}_2$ (B) |           |           |           |
| C                                          | -1.455727 | -1.585246 | -1.482457 |
| C                                          | -2.125406 | -0.438109 | -1.496064 |
| C                                          | -1.452440 | 0.827981  | 1.995056  |
| C                                          | -2.138519 | 1.190774  | 0.917149  |
| C                                          | -0.732373 | 2.114848  | -1.503580 |
| C                                          | 0.604907  | 2.075933  | -1.531480 |
| C                                          | 1.452876  | -1.584158 | -1.480767 |
| C                                          | 2.106602  | -0.440052 | -1.483347 |
| C                                          | 2.055472  | 1.236972  | 0.815923  |
| C                                          | 1.639127  | 0.874694  | 2.073831  |
| C                                          | 0.008490  | -2.433789 | 0.859451  |
| C                                          | -0.045512 | -1.683315 | 1.938669  |
| Ti                                         | 1.592110  | -0.868119 | 0.670297  |
| Ti                                         | 2.346907  | 1.425936  | -1.028607 |
| Ti                                         | 0.003291  | -2.768045 | -1.031694 |
| Ti                                         | 0.025159  | -0.048155 | 2.952130  |
| Ti                                         | -1.421545 | -0.816224 | 0.549641  |
| Ti                                         | -0.013933 | 0.024829  | -1.760449 |
| Ti                                         | 0.000183  | 1.614031  | 0.513855  |
| Ti                                         | -2.428524 | 1.408513  | -0.981041 |
| C                                          | 2.257628  | -0.185064 | 2.852409  |
| O                                          | 2.908804  | -1.072951 | 2.123310  |
| O                                          | 1.739258  | -0.434217 | 4.007799  |

| Ti <sub>8</sub> C <sub>12</sub> -CO <sub>2</sub> (C) |           |           |           |
|------------------------------------------------------|-----------|-----------|-----------|
| C                                                    | -1.468157 | -1.617201 | -1.373312 |
| C                                                    | -2.145722 | -0.480442 | -1.312793 |
| C                                                    | -1.287745 | 0.743956  | 2.151806  |
| C                                                    | -2.004883 | 1.141971  | 1.115661  |
| C                                                    | -0.740203 | 2.055819  | -1.368149 |
| C                                                    | 0.582884  | 2.091208  | -1.480745 |
| C                                                    | 1.425670  | -1.577881 | -1.561633 |
| C                                                    | 2.082351  | -0.424429 | -1.614696 |
| C                                                    | 2.171310  | 1.207711  | 0.811528  |
| C                                                    | 1.594761  | 0.804154  | 1.936969  |
| C                                                    | 0.136584  | -2.450785 | 0.924368  |
| C                                                    | 0.177598  | -1.714407 | 2.020892  |
| Ti                                                   | 1.507317  | -0.823204 | 0.477532  |
| Ti                                                   | 2.352176  | 1.417040  | -1.095710 |
| Ti                                                   | 0.027958  | -2.775944 | -0.980224 |
| Ti                                                   | 0.198440  | -0.090569 | 3.108937  |
| Ti                                                   | -1.319418 | -0.865811 | 0.677482  |
| Ti                                                   | -0.050796 | 0.019507  | -1.748603 |
| Ti                                                   | 0.056447  | 1.610930  | 0.607157  |
| Ti                                                   | -2.431098 | 1.349630  | -0.760564 |
| C                                                    | -0.903805 | -0.836960 | 4.773935  |
| O                                                    | 0.186319  | -0.201826 | 5.059291  |
| O                                                    | -1.749301 | -1.375947 | 5.422154  |
| Ti <sub>8</sub> C <sub>12</sub> -CO <sub>2</sub> (D) |           |           |           |
| C                                                    | -1.450705 | -1.602078 | -1.521926 |
| C                                                    | -2.115009 | -0.449712 | -1.507511 |
| C                                                    | -1.491945 | 0.863401  | 2.078726  |
| C                                                    | -2.125929 | 1.228727  | 0.947556  |
| C                                                    | -0.668244 | 2.058085  | -1.508448 |
| C                                                    | 0.661880  | 2.059841  | -1.523294 |
| C                                                    | 1.466810  | -1.605326 | -1.415935 |
| C                                                    | 2.125165  | -0.464145 | -1.416361 |
| C                                                    | 2.067569  | 1.320198  | 0.888348  |
| C                                                    | 1.366016  | 1.017486  | 1.952720  |
| C                                                    | -0.105968 | -2.447372 | 0.889756  |
| C                                                    | -0.194749 | -1.687917 | 1.953731  |
| Ti                                                   | 1.508768  | -0.868219 | 0.773072  |
| Ti                                                   | 2.397160  | 1.405864  | -1.011254 |
| Ti                                                   | -0.015757 | -2.776645 | -1.009692 |
| Ti                                                   | 0.028040  | -0.013170 | 2.932349  |
| Ti                                                   | -1.442577 | -0.771342 | 0.514176  |
| Ti                                                   | 0.035368  | -0.019145 | -1.744972 |
| Ti                                                   | -0.052554 | 1.638099  | 0.513276  |
| Ti                                                   | -2.412293 | 1.393220  | -0.962282 |
| C                                                    | 2.078897  | -1.196391 | 2.751965  |
| O                                                    | 2.972436  | -1.712143 | 2.048407  |
| O                                                    | 1.837803  | -1.056872 | 3.956667  |

| <b>Ti<sub>8</sub>C<sub>12</sub>-CO<sub>2</sub> (<i>E</i>)</b> |           |           |           |
|---------------------------------------------------------------|-----------|-----------|-----------|
| C                                                             | -1.447079 | -1.596464 | -1.394371 |
| C                                                             | -2.112409 | -0.445510 | -1.380331 |
| C                                                             | -1.410366 | 0.863755  | 2.026656  |
| C                                                             | -2.126235 | 1.279841  | 0.981652  |
| C                                                             | -0.720310 | 2.124407  | -1.451676 |
| C                                                             | 0.612001  | 2.080276  | -1.473874 |
| C                                                             | 1.473743  | -1.671090 | -1.497972 |
| C                                                             | 2.100259  | -0.494264 | -1.505278 |
| C                                                             | 2.139683  | 1.217258  | 0.862742  |
| C                                                             | 1.504311  | 0.836644  | 1.955267  |
| C                                                             | 0.065942  | -2.512411 | 0.935395  |
| C                                                             | 0.073771  | -1.703656 | 1.995340  |
| Ti                                                            | 1.473776  | -0.882377 | 0.543503  |
| Ti                                                            | 2.375106  | 1.376684  | -1.050252 |
| Ti                                                            | 0.010279  | -2.825605 | -0.974251 |
| Ti                                                            | 0.069051  | -0.005157 | 2.949196  |
| Ti                                                            | -1.283991 | -0.758804 | 0.612519  |
| Ti                                                            | 0.007985  | 0.015202  | -1.613706 |
| Ti                                                            | -0.015323 | 1.693617  | 0.574923  |
| Ti                                                            | -2.445574 | 1.422779  | -0.922430 |
| C                                                             | 0.000021  | -0.086485 | 6.339704  |
| O                                                             | 0.041846  | -0.048095 | 5.177820  |
| O                                                             | -0.040068 | -0.123664 | 7.484791  |

**Table S9** Comparison of the relative energies of Ti<sub>8</sub>C<sub>12</sub>-CO<sub>2</sub> complexes obtained using different levels of XC functionals and LDZ basis set.

| Isomer   | Relative energy (eV) |      |      |          |           |
|----------|----------------------|------|------|----------|-----------|
|          | B3LYP                | PBE  | PBE0 | PBE0+GD3 | PBE0+BSSE |
| <i>A</i> | 0.00                 | 0.03 | 0.00 | 0.00     | 0.00      |
| <i>B</i> | 0.09                 | 0.00 | 0.00 | 0.02     | 0.05      |
| <i>C</i> | 0.42                 | 0.74 | 0.62 | 0.67     | 0.46      |
| <i>D</i> | 0.74                 | 0.73 | 0.86 | 0.86     | 0.86      |
| <i>E</i> | 0.98                 | 1.01 | 0.77 | 0.77     | 0.57      |

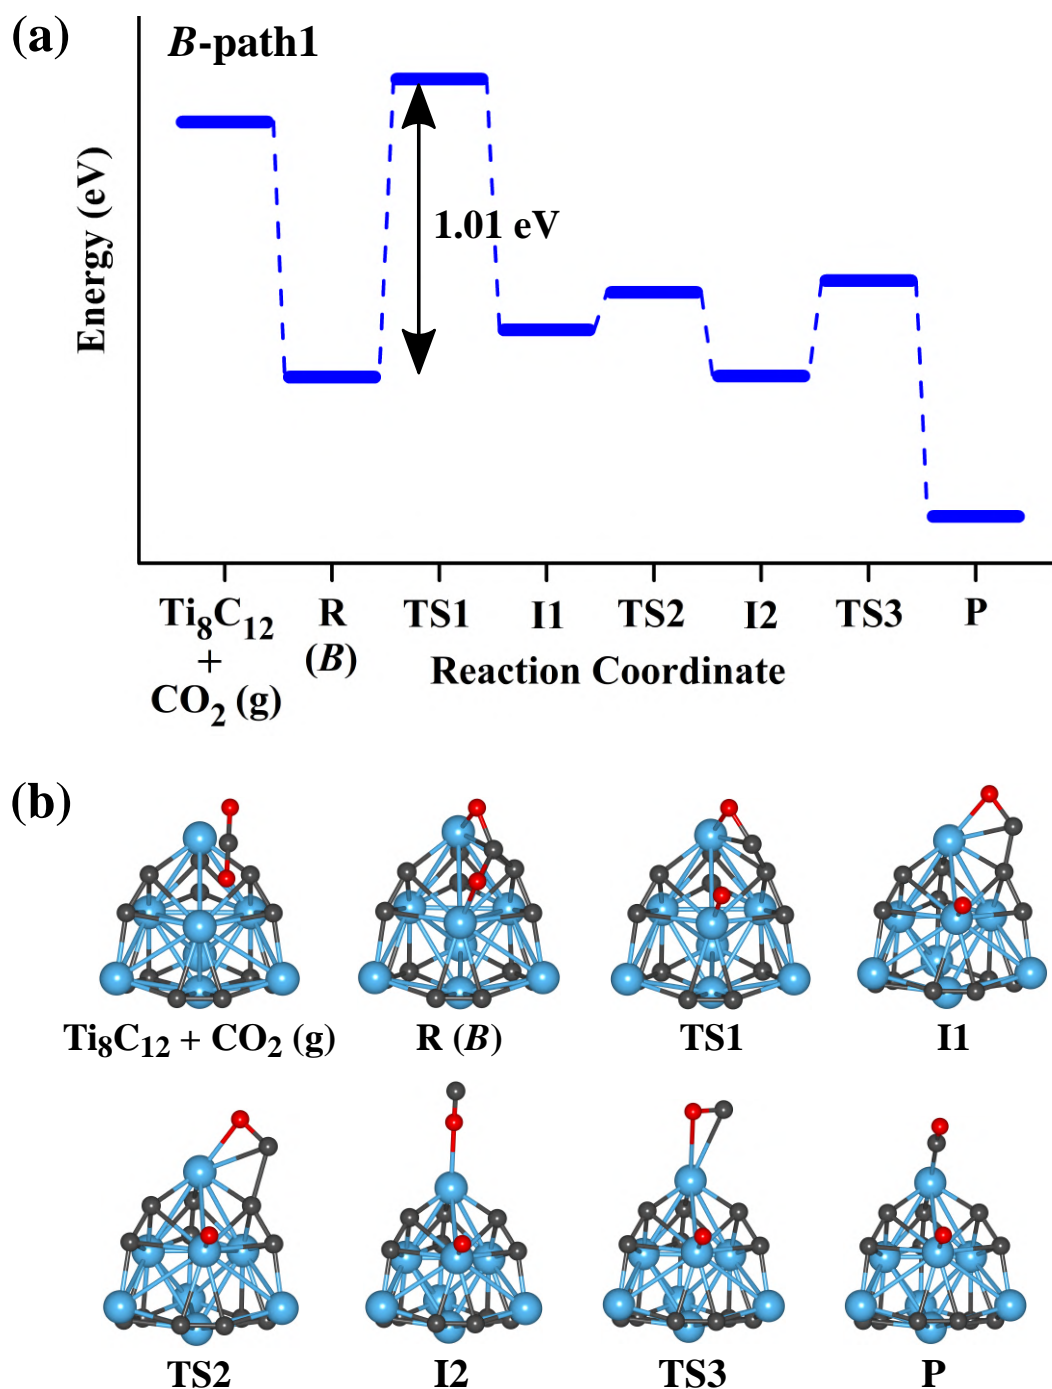

**Fig. S7** (a) Reaction path (*B*-path1) for  $\text{CO}_2$  dissociation to CO and O fragments on  $\text{Ti}_8\text{C}_{12}$  metcar obtained using B3LYP XC functional and LDZ basis set. TS1, TS2, and TS3 represents the cleavage of C-O bond and the diffusion of CO and O fragments. (b) Optimized structures for dissociation of  $\text{CO}_2$  on  $\text{Ti}_8\text{C}_{12}$  metcar. Blue, grey, and red balls represent Ti, C, and O atoms, respectively.

## References

- [1] N. Blessing, S. Burkart and G. Ganteför, *Eur. Phys. J. D*, 2001, **17**, 37–41.
- [2] P. Liu, J. A. Rodriguez, H. Hou and J. T. Muckerman, *J. Chem. Phys.*, 2003, **118**, 7737–7740.
- [3] T. Baruah, M. R. Pederson, M. L. Lyn and A. W. Castleman, *Phys. Rev. A*, 2002, **66**, 053201.
- [4] L. R. Brock and M. A. Duncan, *J. Phys. Chem.*, 1996, **100**, 5654–5659.
- [5] L.-S. Wang, S. Li and H. Wu, *J. Phys. Chem.*, 1996, **100**, 19211–19214.
- [6] H. Chen, M. Feyereisen, X. P. Long and G. Fitzgerald, *Phys. Rev. Lett.*, 1993, **71**, 1732–1735.
- [7] J. R. Schmidt, N. Shenvi and J. C. Tully, *J. Chem. Phys.*, 2008, **129**, 114110.
- [8] E. B. Wilson, J. C. Decius and P. C. Cross, *Molecular vibrations: The theory of infrared and Raman vibration spectra*, New York: McGraw-Hill, 1955.
- [9] W. J. Hehre, L. Radom, P. v. R. Schleyer and J. A. Pople, *Ab Initio molecular orbital theory*, Wiley, New York, 1986.
- [10] D. van Heijnsbergen, G. von Helden, M. A. Duncan, A. J. A. van Roij and G. Meijer, *Phys. Rev. Lett.*, 1999, **83**, 4983–4986.
- [11] J. A. Pople, A. P. Scott, M. W. Wong and L. Radom, *Isr. J. Chem.*, 1993, **33**, 345–350.
- [12] A. Alvarez-Garcia, E. Flórez, A. Moreno and C. Jimenez-Orozco, *Mol. Catal.*, 2019, 110733–110741.
- [13] A. E. Green, J. Justen, W. Schöllkopf, A. S. Gentleman, A. Fielicke and S. R. Mackenzie, *Angew. Chem. Int. Ed.*, 2018, **57**, 14822–14826.
