# Supplementary figures and images for: Role of metcar on the adsorption and activation of carbon dioxide: a DFT study
Source: Royal Society of Chemistry journal article supplement (doi:10.1039/d0cp05756h), 2021-01-01

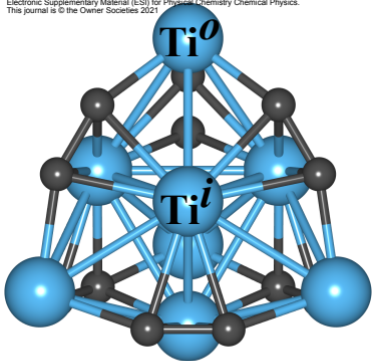

**C<sub>3v</sub> (0.00)**

Supplement: d0cp05756h2.pdf [file d0cp05756h2.pdf]

Intensity (arb. units)

— Exp.

— FWHM = 8 cm<sup>-1</sup>

— FWHM = 40 cm<sup>-1</sup>

C<sub>3v</sub>

D<sub>2d</sub>

0 200 400 600 800 1000 1200 1400 1600

Frequency (cm<sup>-1</sup>)

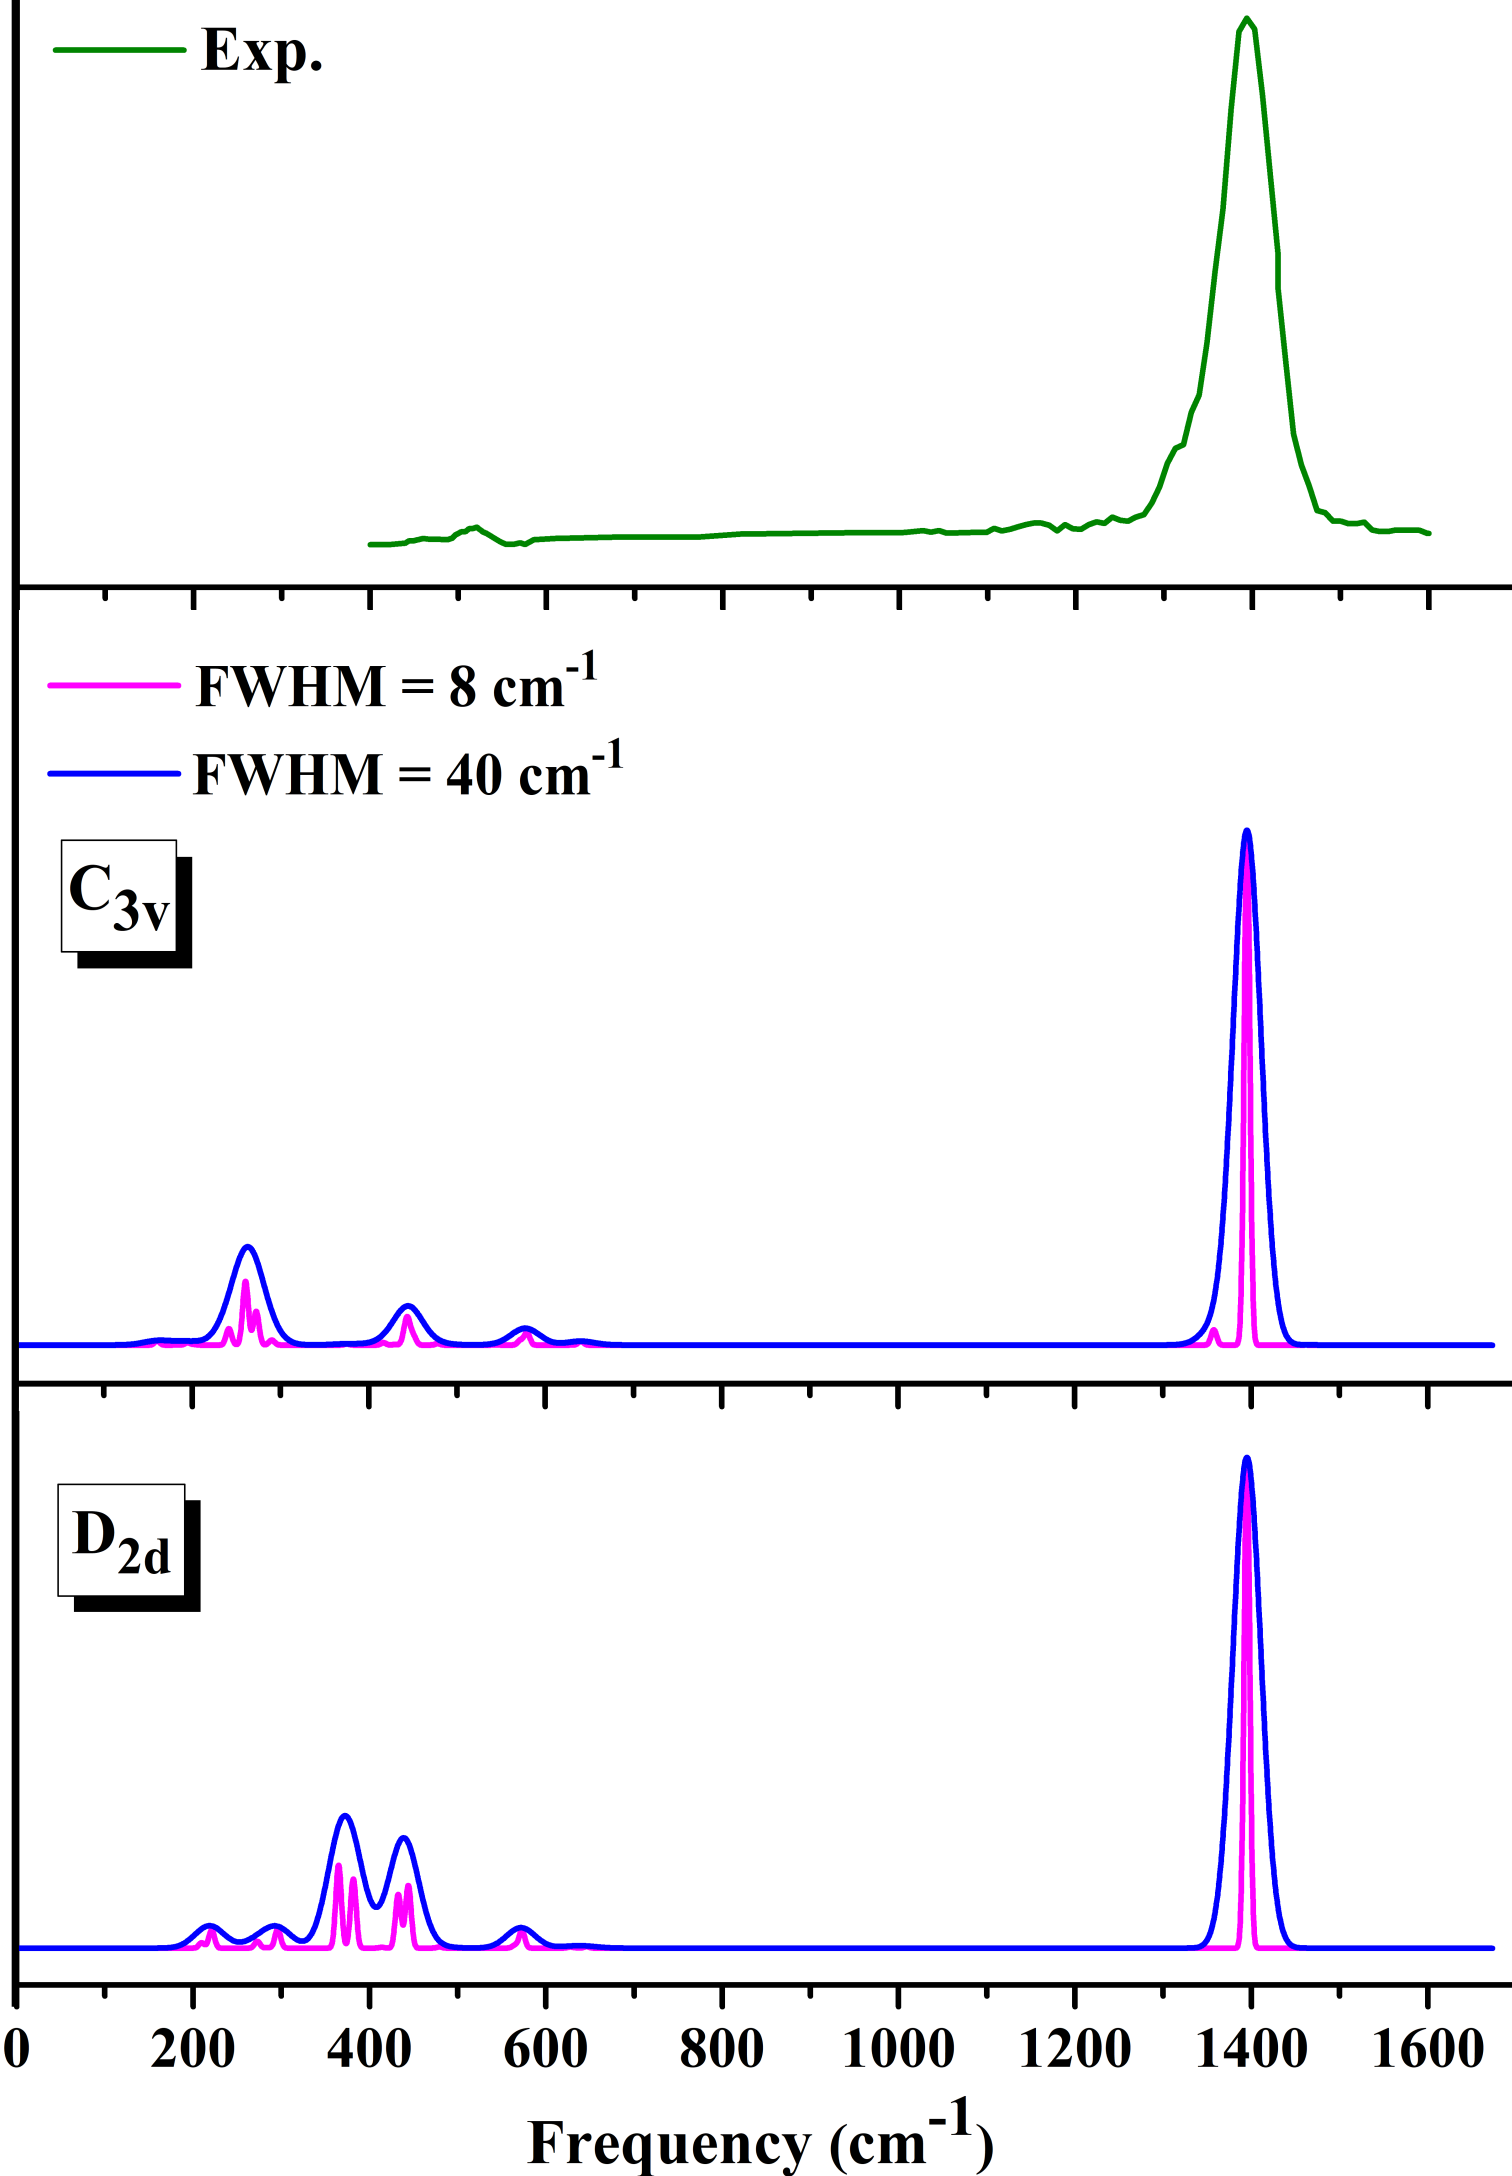

Supplement: d0cp05756h3.pdf [file d0cp05756h3.pdf]

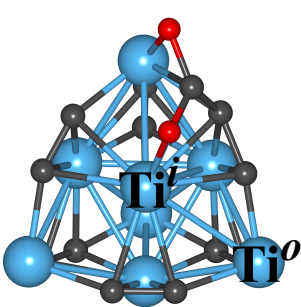

***B* (1, 0.00)**

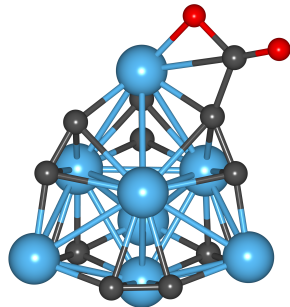

***A* (1, 0.03)**

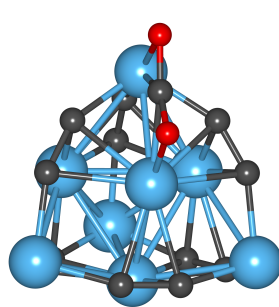

***D* (1, 0.73)**

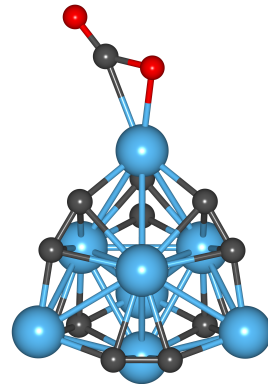

***C* (1, 0.74)**

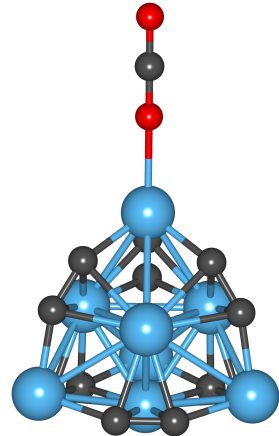

***E* (3, 1.01)**

Supplement: d0cp05756h5.pdf [file d0cp05756h5.pdf]

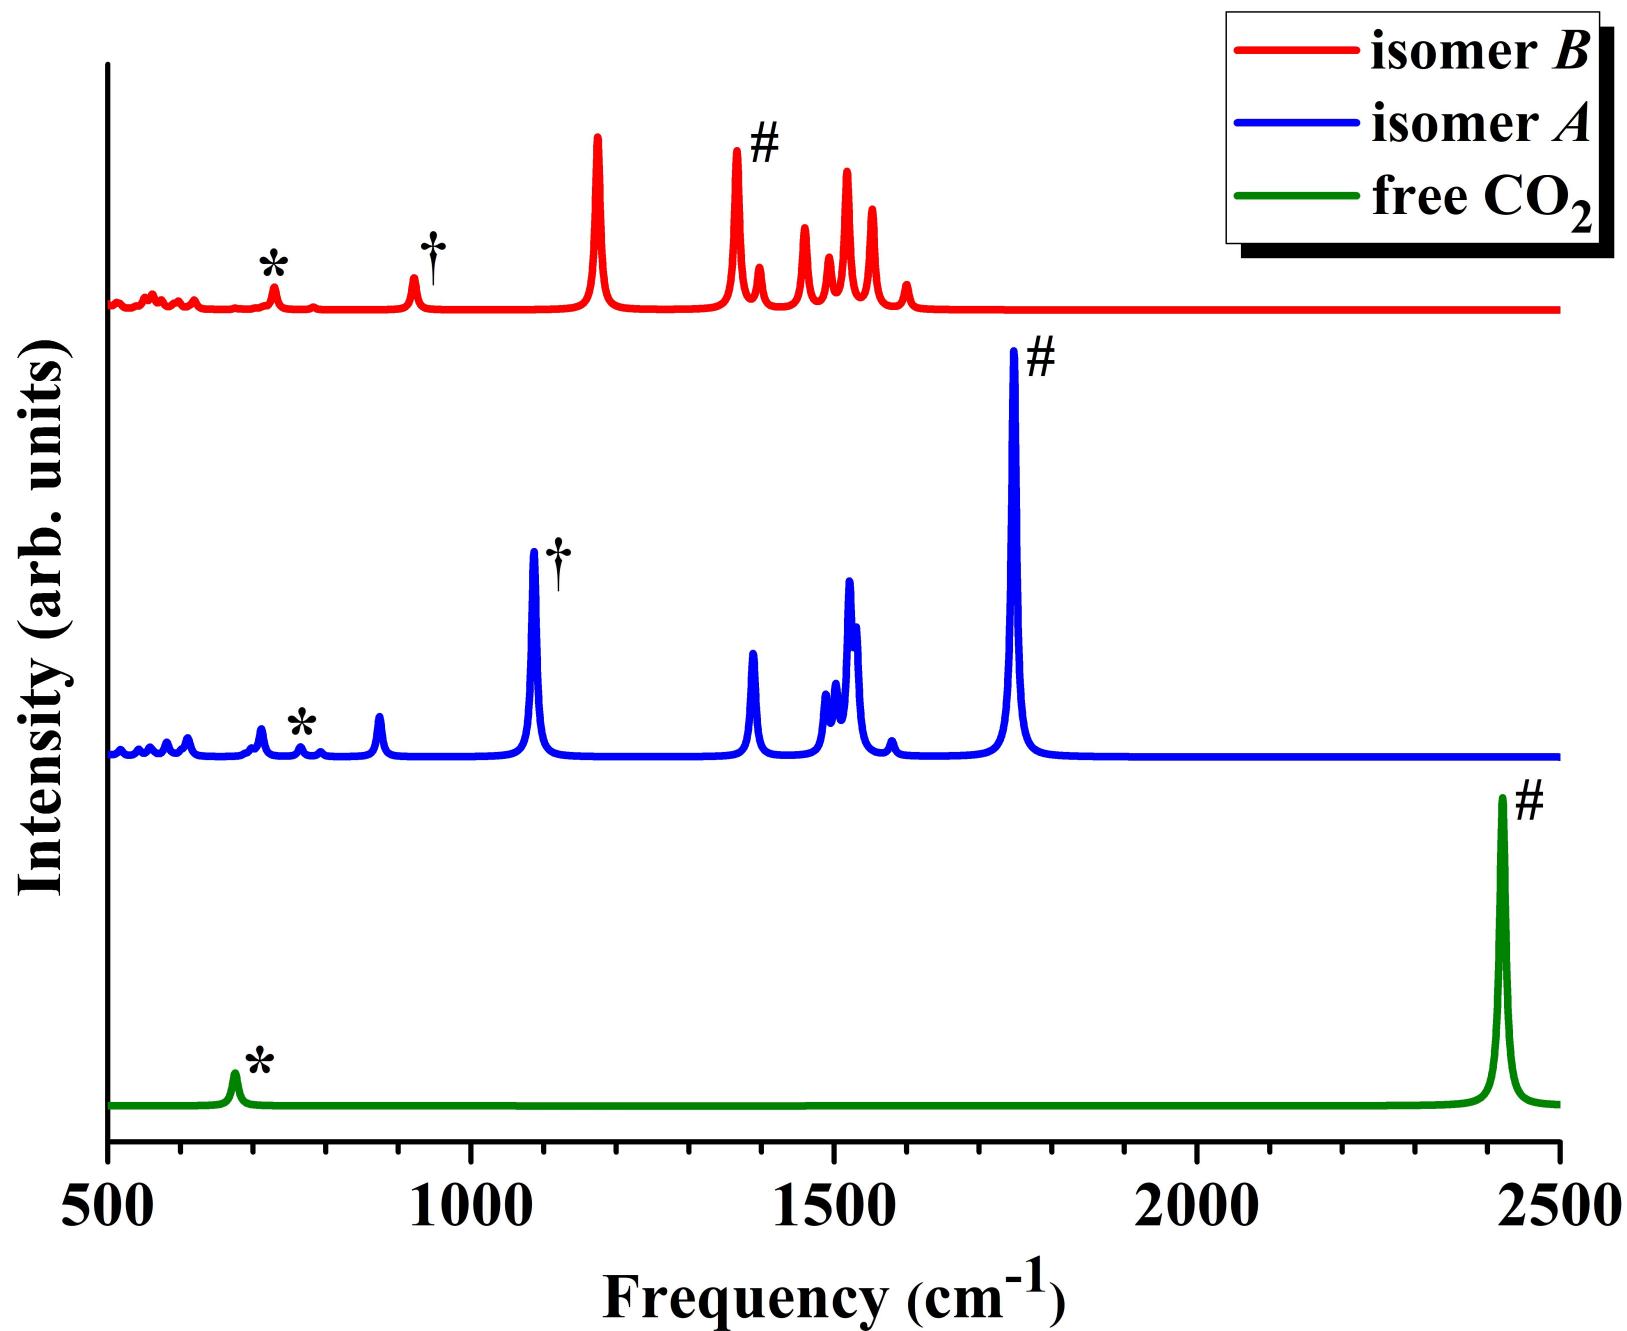

Supplement: d0cp05756h7.pdf [file d0cp05756h7.pdf]
